# Supplementary material
Source: PubMed Central journal article supplement (PMC8349887)
Supplement: NIHMS1713112-supplement-Supplementary_Figures.pdf [file NIHMS1713112-supplement-Supplementary_Figures.pdf]

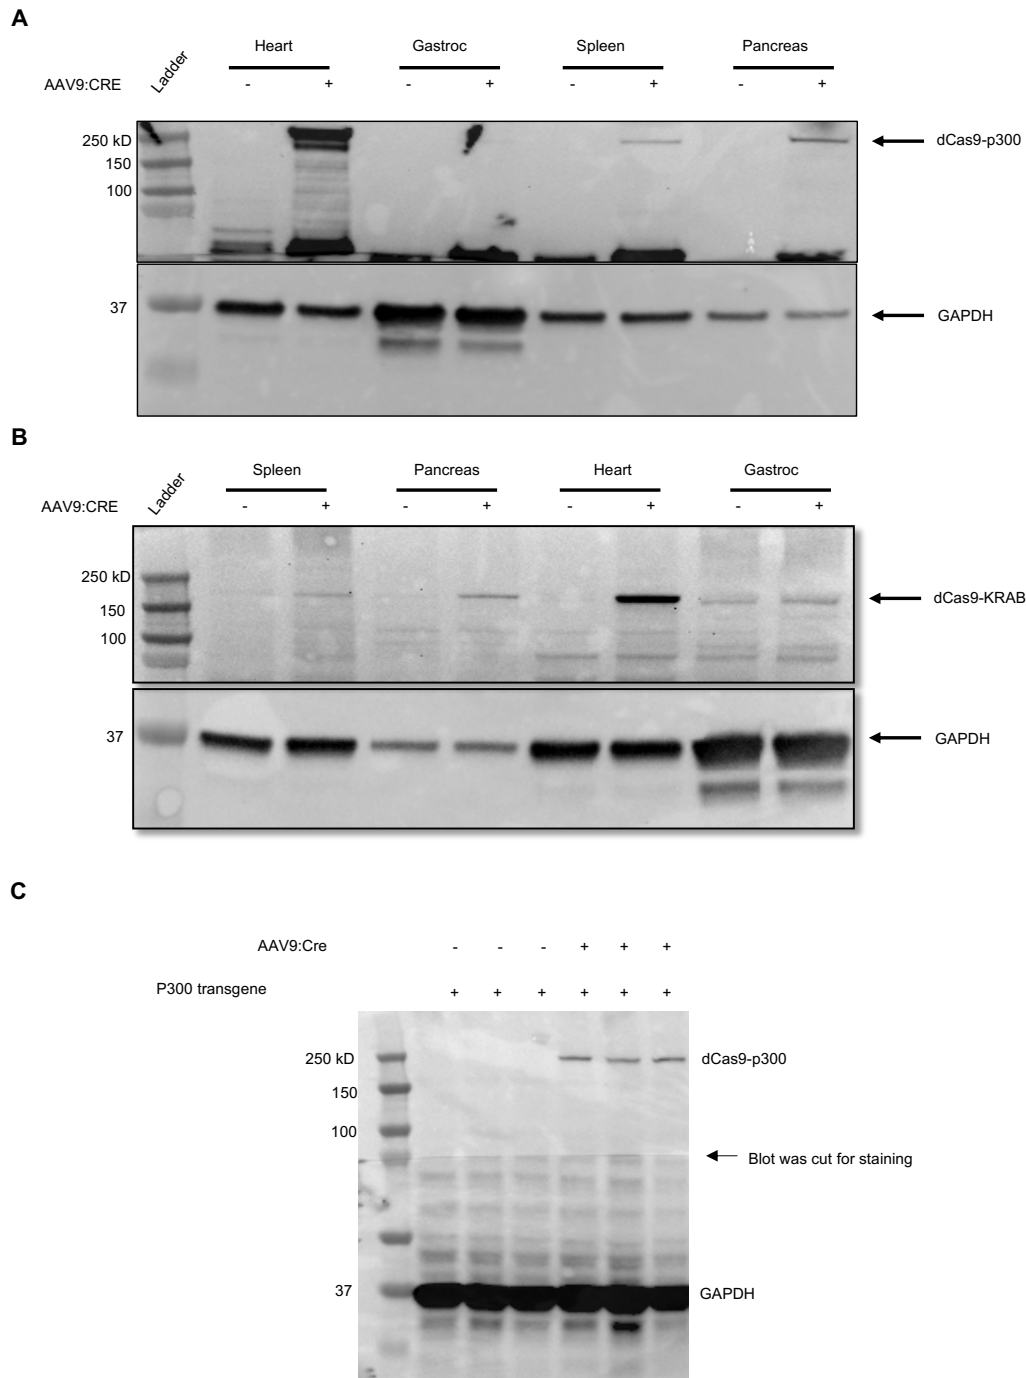

**Supplemental Figure 1: Western blot analysis of dCas9<sup>p300</sup> or dCas9<sup>KRAB</sup> protein levels following systemic administration of AAV9:CMV.Cre.** A) High levels of dCas9<sup>p300</sup> are detected 14 days post injection in heart, moderate levels are seen in the spleen and pancreas, and low levels in the gastrocnemius. B) Similarly, high levels of dCas9<sup>KRAB</sup> is found in the heart while moderate levels are seen in the spleen and pancreas at 8 weeks post injection. C) dCas9<sup>p300</sup> protein levels in the liver of AAV9:CMV.Cre treated animals 14 days post-treatment with or without *Cre*. All experiments were repeated twice

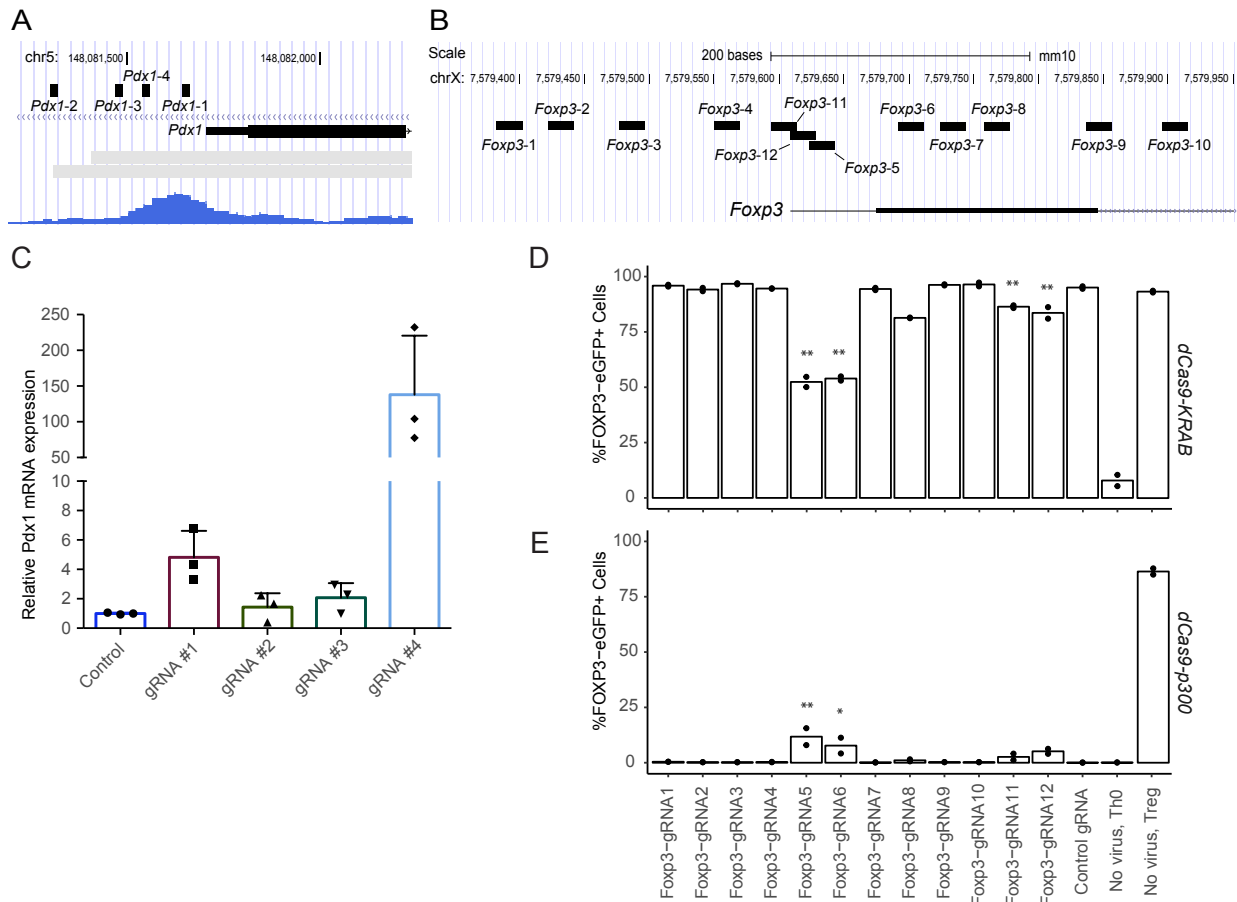

**Supplemental Figure 2: Testing candidate gRNAs in primary fibroblasts and T cells from *Rosa26:LSL-dCas9<sup>p300</sup>* mice.** A) Genome browser track showing the location of the four tested gRNAs for the *Pdx1* promoter region and B) Twelve gRNAs for the *Foxp3* promoter region. C) *Pdx1*-targeting gRNAs were tested in primary fibroblasts from the hindlimb of a *Rosa26:LSL-dCas9<sup>p300</sup>* mouse in triplicate and compared to a *Myod*-targeting control gRNA. gRNA #4 significantly upregulated *Pdx1* as compared to controls. (n=3 per gRNA, one-way ANOVA with Dunnett's post-hoc, p=0.0035). D) Percentage of FOXP3-eGFP positive cells after dCas9<sup>KRAB</sup>-induced repression with *Foxp3*-targeting gRNAs in iTreg cells from a Cd4:Cre-*Rosa26:LSL-dCas9<sup>KRAB</sup>* mouse compared to control gRNA treated or non-transduced cells (one-way ANOVA with Dunnett's post-hoc, p=1.3E-13). E) Percentage of FOXP3-eGFP positive cells after dCas9<sup>p300</sup>-induced activation with *Foxp3*-targeting gRNAs in Th0 cells from a Cd4:Cre-*Rosa26:LSL-dCas9<sup>p300</sup>* mouse compared to a control non-targeting gRNA and non-transduced cells (one-way ANOVA with Dunnett's post-hoc, p=0.0012). For D-E, n=2 mice per condition, \*\* p<0.001, \* p=0.219. All error bars represent standard deviation.

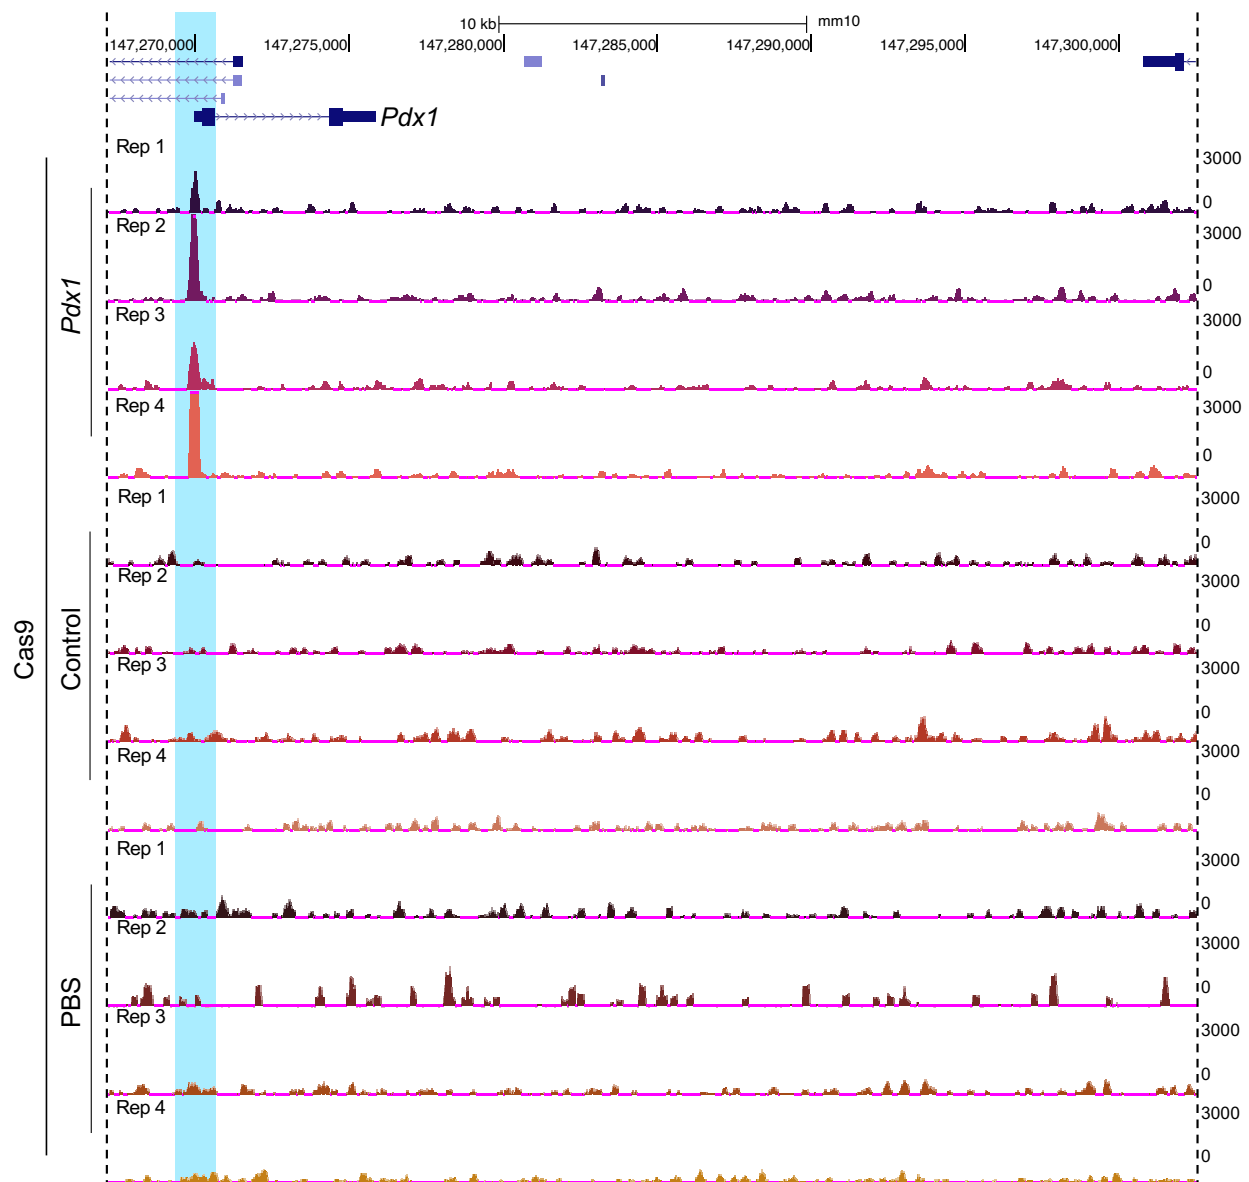

**Supplemental Figure 3: Specificity of dCas9<sup>p300</sup> binding the *Pdx1* promoter *in vivo* in the liver of *Rosa26:LSL-dCas9<sup>p300</sup>* mice following systemic administration of AAV9 encoding both *Cre* and a gRNA.** Genome browser tracks showing Cas9 ChIP-seq signal from livers of dCas9<sup>p300</sup> mice 14 days post-treatment with an AAV9:Cbh.Cre-gRNA, either *Pdx1*-gRNA or the control-gRNA, and mice treated with saline (PBS). The highlighted region shows the area where dCas9<sup>p300</sup> is targeted to the promoter of *Pdx1*. Specific signal is found only in the *Pdx1*-gRNA treated animals.

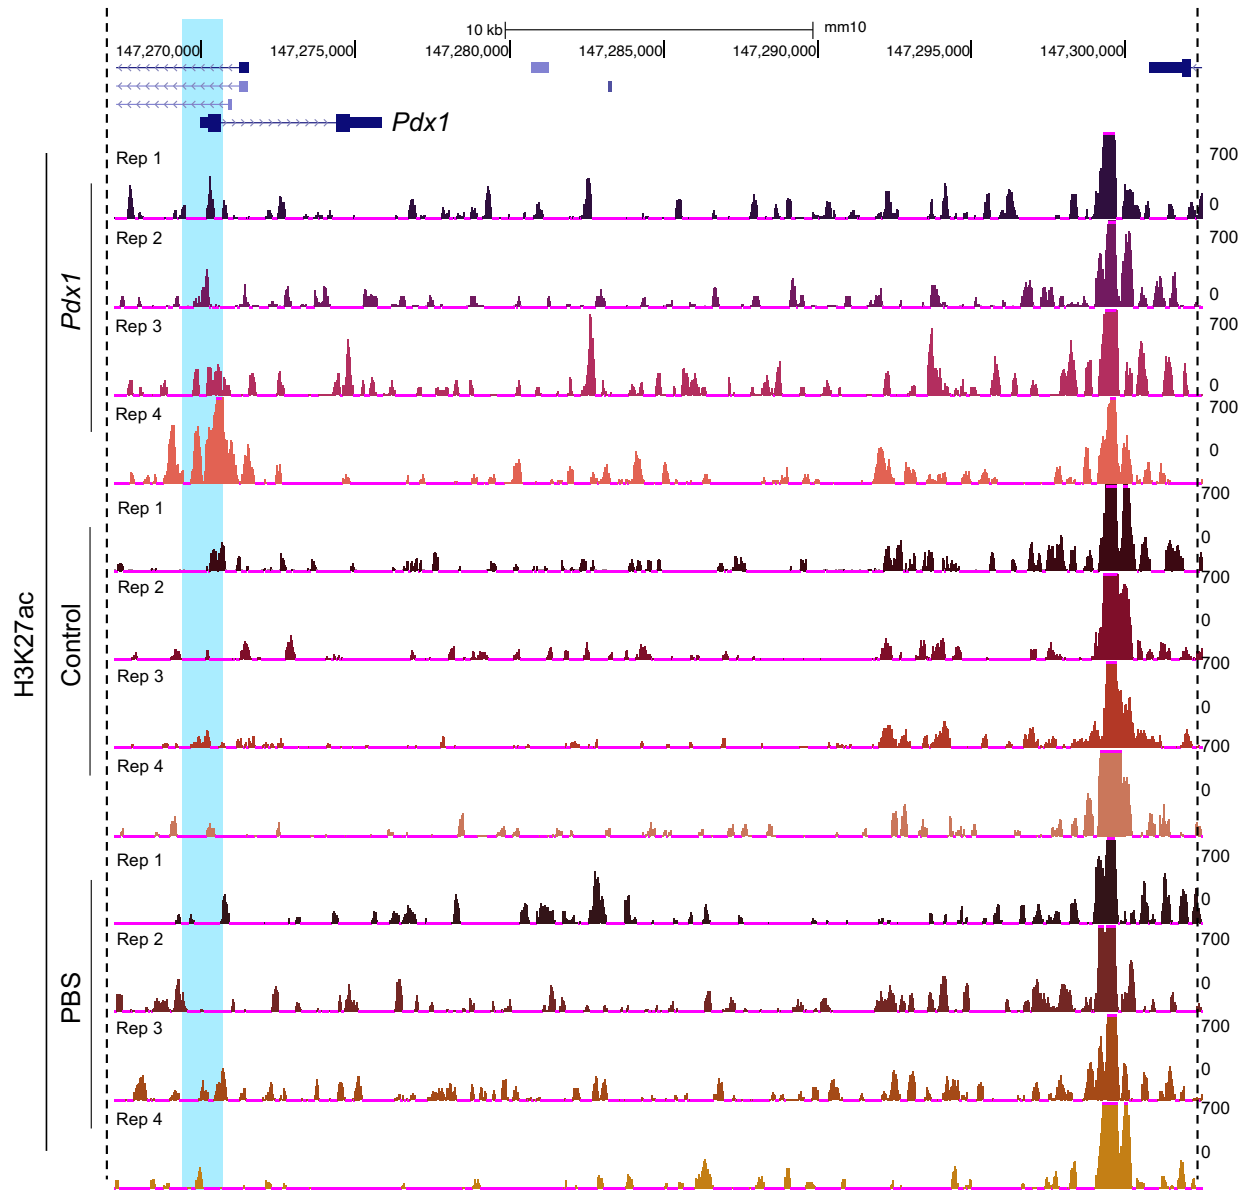

**Supplemental Figure 4: H3K27ac enrichment at the *Pdx1* promoter *in vivo* in the liver of *Rosa26:LSL-dCas9<sup>p300</sup>* mice following systemic administration of AAV9 encoding both *Cre* and a gRNA.** Genome browser tracks of H3K27ac ChIP-seq signal from livers of dCas9<sup>p300</sup> mice 14 days post-treatment with AAV9:Cbh.Cre-gRNA, encoding either the *Pdx1*-targeting gRNA or the control non-targeting gRNA, and mice treated with saline (PBS). The highlighted region shows the area where dCas9<sup>p300</sup> is targeted to the promoter of *Pdx1*. Enrichment of H3K27ac around the dCAS9<sup>p300</sup> target site in the *Pdx1* gRNA treated mice is highlighted in blue.

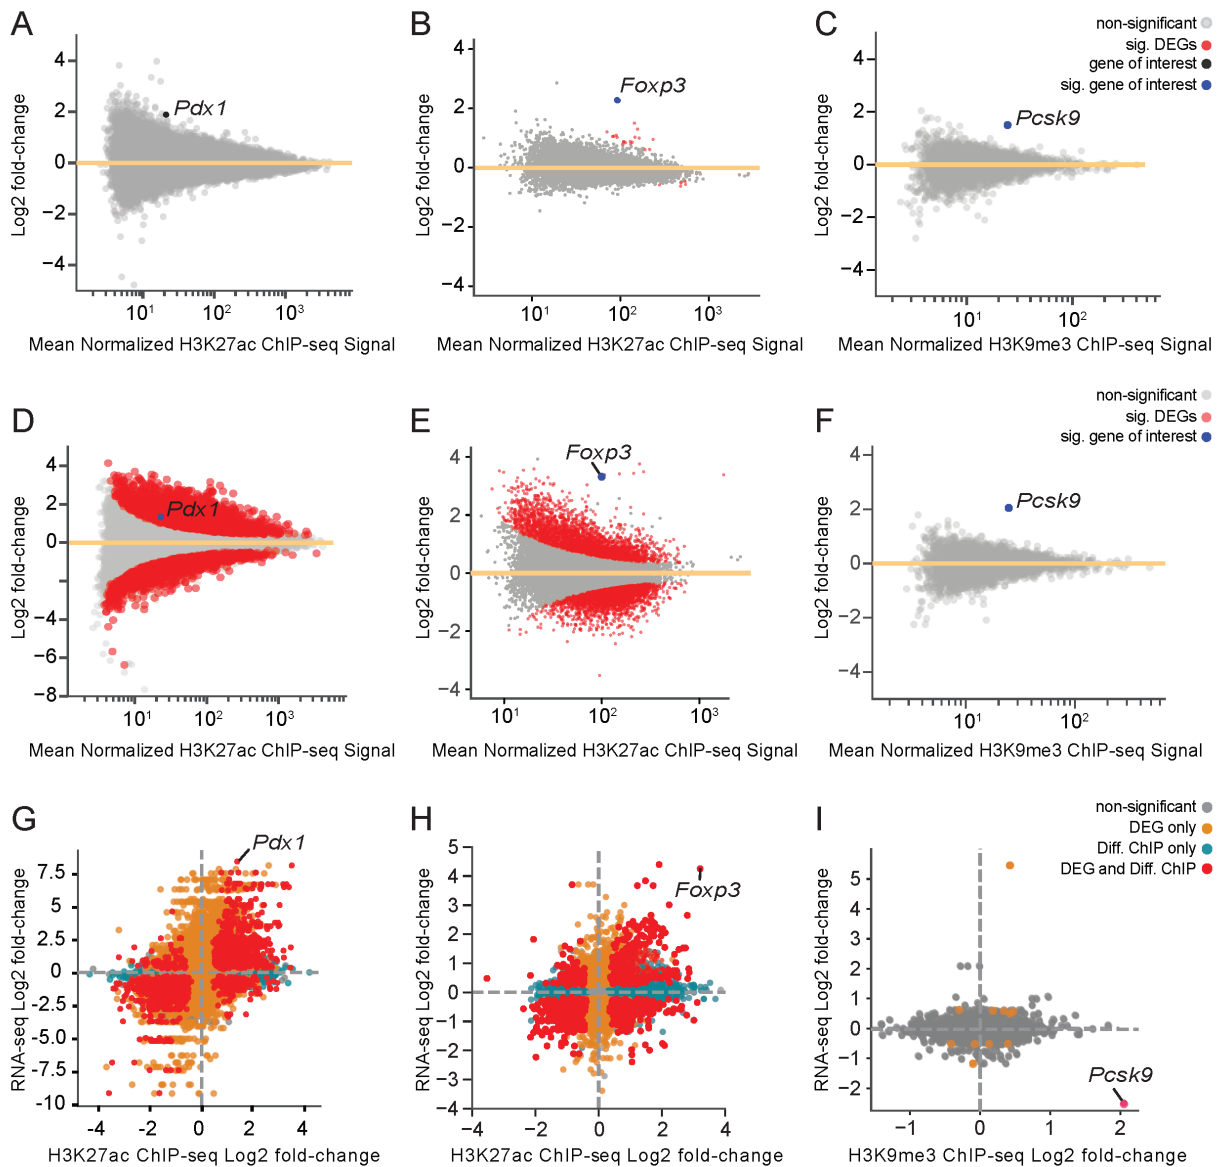

**Supplemental Figure 5: Genome-wide analysis of histone ChIP-seq data from *Rosa26:LSL-dCas9<sup>p300</sup>* and *dCas9<sup>KRAB</sup>* mice in liver samples and T cells after transduction with gRNA.** A) MA plot shows log<sub>2</sub>(fold-change) in H3K27ac enrichment for samples from *Rosa26:LSL-dCas9<sup>p300</sup>* mice when comparing liver cells treated with *Pdx1*-targeting gRNA (n=4) vs control non-targeting gRNA (n=4). B) MA plot shows log<sub>2</sub>(fold-change) in H3K27ac enrichment for samples from *Rosa26:LSL-dCas9<sup>p300</sup>* mice when comparing Th0 cells from mice crossed to *Cd4:Cre* and treated with *Foxp3*-targeting gRNA (n=3) vs control non-targeting gRNA (n=3). C) MA plot shows log<sub>2</sub>(fold-change) in H3K9me3 enrichment from *Rosa26:LSL-dCas9<sup>KRAB</sup>* mouse liver samples treated with *Pcsk9*-targeting gRNA (n=3) vs control non-targeting gRNA (n=3). Log<sub>2</sub>(fold-change) in D) H3K27ac enrichment in samples from *Rosa26:LSL-dCas9<sup>p300</sup>* mice when comparing liver cells treated with *Pdx1*-targeting gRNA (n=4) vs saline control (n=4), E) H3K27ac enrichment in Th0 cells from *Rosa26:LSL-dCas9<sup>p300</sup>* mice treated with *Foxp3*-targeting gRNA with *Cd4:Cre* (n=3) vs without *Cd4:Cre* (n=3), and F) H3K9me3 enrichment from *Rosa26:LSL-dCas9<sup>KRAB</sup>* mouse liver samples treated with *Pcsk9*-targeting gRNA (n=4) vs saline (n=4). G) Relationship of log<sub>2</sub>(fold-change) in read counts per million (CPM) from RNA-seq and H3K27ac ChIP-seq when

comparing between *Rosa26:LSL-dCas9<sup>p300</sup>* mouse liver samples treated with Pdx1-targeting gRNA vs saline, H) *Rosa26:LSL-dCas9<sup>p300</sup>* Th0 cells treated with *Foxp3*-gRNA with or without *Cd4:Cre*, and I) the relationship between RNA-seq and H3K9me3 ChIP-seq when comparing *Rosa26:LSL-dCas9<sup>KRAB</sup>* mouse liver samples treated with *Pcsk9*-targeting gRNA vs saline control (A-F) grey = non-significant; red = differentially expressed gene (DEG); black = non-significant gene of interest; blue = differentially expressed gene of interest. (G-H) grey = non-significant; orange = significant DEG only; blue=significant differently enriched ChIP-seq signal only; red=significant DEG and ChIP-seq enrichment, FDR < 0.05 for liver samples, FDR < 0.01 for T cell samples).

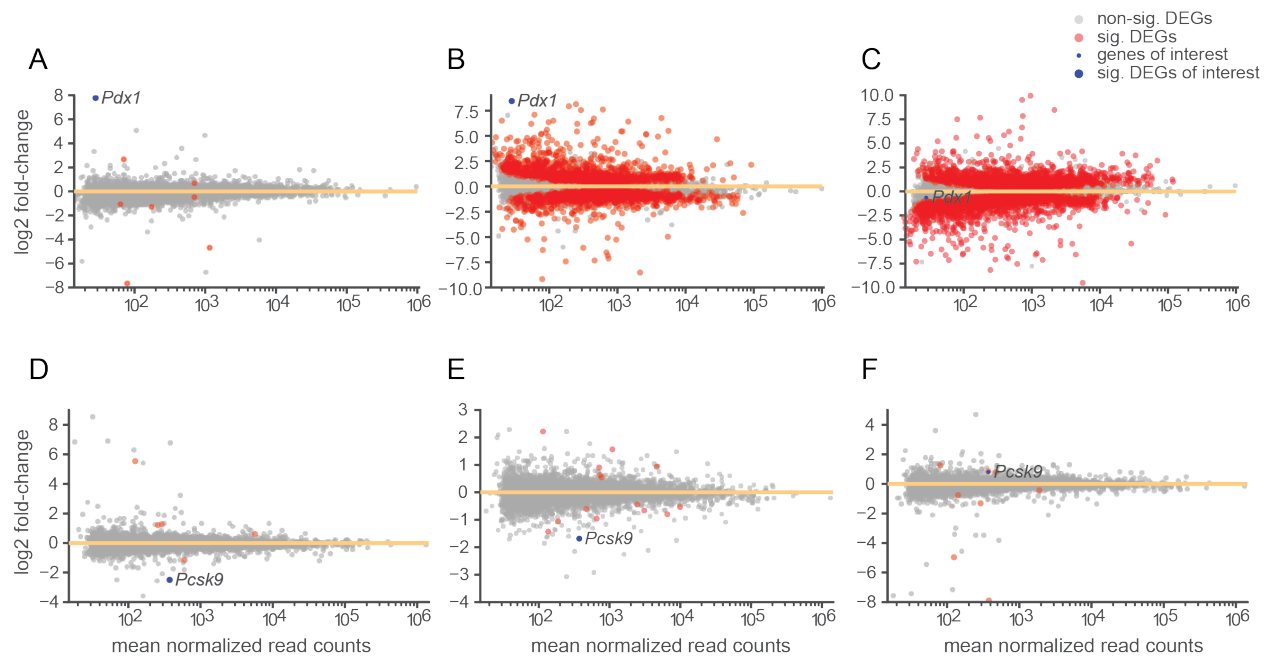

**Supplemental Figure 6: Differential analysis of RNA-seq data from dCas9 epigenome editor mouse liver samples after transduction.** A) MA plots show log<sub>2</sub>(fold-change) in gene expression for *Rosa26:LSL-dCas9<sup>p300</sup>* mouse liver when comparing between *Pdx1*-targeting gRNA vs control non-targeting gRNA, B) *Pdx1*-targeting gRNA vs saline, and C) control non-targeting gRNA vs saline. D) Log<sub>2</sub>(fold-change) in gene expression for *Rosa26:LSL-dCas9<sup>KRAB</sup>* mouse liver when comparing between *Pcsk9*-targeting gRNA vs control non-targeting gRNA, E) *Pcsk9*-targeting gRNA vs PBS, and F) control non-targeting gRNA vs PBS. Red and blue dots indicate significant changes in gene expression (FDR < 0.05). All data are average of n=4 mice per treatment group.

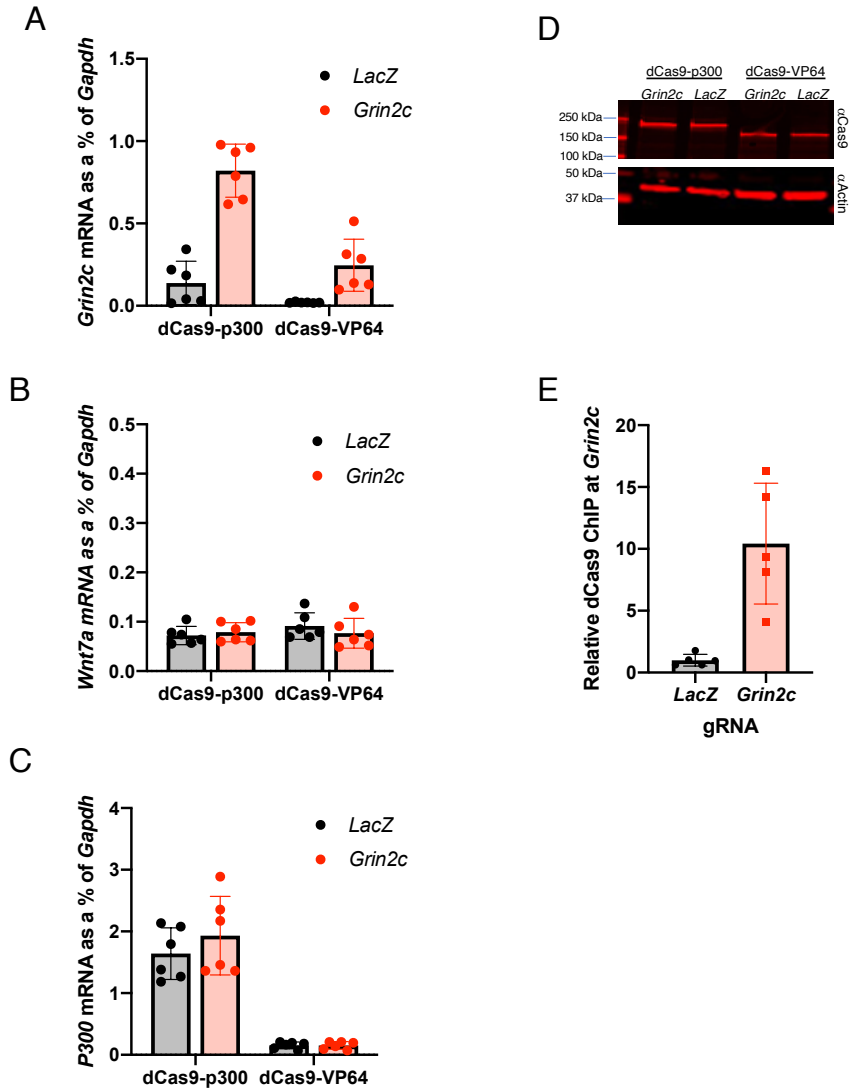

**Supplemental Figure 7. Comparison of dCas9<sup>VP64</sup> and dCas9<sup>p300</sup> activation of *Grin2c* expression in cerebellar granule neurons.** A) qRT-PCR comparing *Grin2c* mRNA in CGNs transduced with lentivirus encoding either dCas9<sup>VP64</sup> or Cre, and control *LacZ* or *Grin2c* promoter-targeting gRNAs. Two-way ANOVA was significant for gRNA  $F(1,20)=72.26$   $p<0.0001$ , dCas9  $F(1,20)=42.08$   $p<0.001$  and gRNA x dCas9 interaction  $F(1,20)=18.21$   $p=0.0004$ .  $n=6$  per condition. By Sidak post-hoc test, *Grin2c* vs *LacZ* gRNA for dCas9<sup>p300</sup>  $p<0.0001$  and for dCas9<sup>VP64</sup>  $p=0.43$ . dCas9<sup>p300</sup> vs dCas9<sup>VP64</sup> for *Grin2c*  $p<0.0001$ . B) qRT-PCR for *Wnt7a* mRNA in the same samples as (A) as a measure of maturity of the neurons. Two-way ANOVA showed no significant effect of gRNA  $F(1,20)=0.16$   $p=0.69$  of dCas9  $F(1,20)=0.74$   $p=0.40$ .  $n=6$  per condition. C) qRT-PCR for human *P300* mRNA in the same samples from (A) to demonstrate transgene induction by *Cre* addition. Two-way ANOVA was significant for dCas9  $F(1,20)=108.9$   $p<0.0001$  but not gRNA  $F(1,20)=0.86$   $p=0.36$ .  $n=6$  per condition. D) Representative western blot of dCas9 expression in cerebellar granule neurons transduced as in (A). Actin is shown as a loading control. Molecular weight (MW) markers shown on left.  $n=2$ , repeated twice, raw images in Supplementary Information 1. E) ChIP-qPCR for dCas9 from CGNs of the dCas9<sup>p300</sup> transgenic mice transduced with *Cre* and the *LacZ* or *Grin2c*-gRNAs. *Grin2c* signal in the pulldown was normalized to *Gapdh* in the same sample as a control for sample processing. *Grin2c* vs *LacZ*  $p=0.0026$  by student's two-tailed t-test,  $n=5$  per condition. For all graphs, points show mean and error bars show standard deviation.



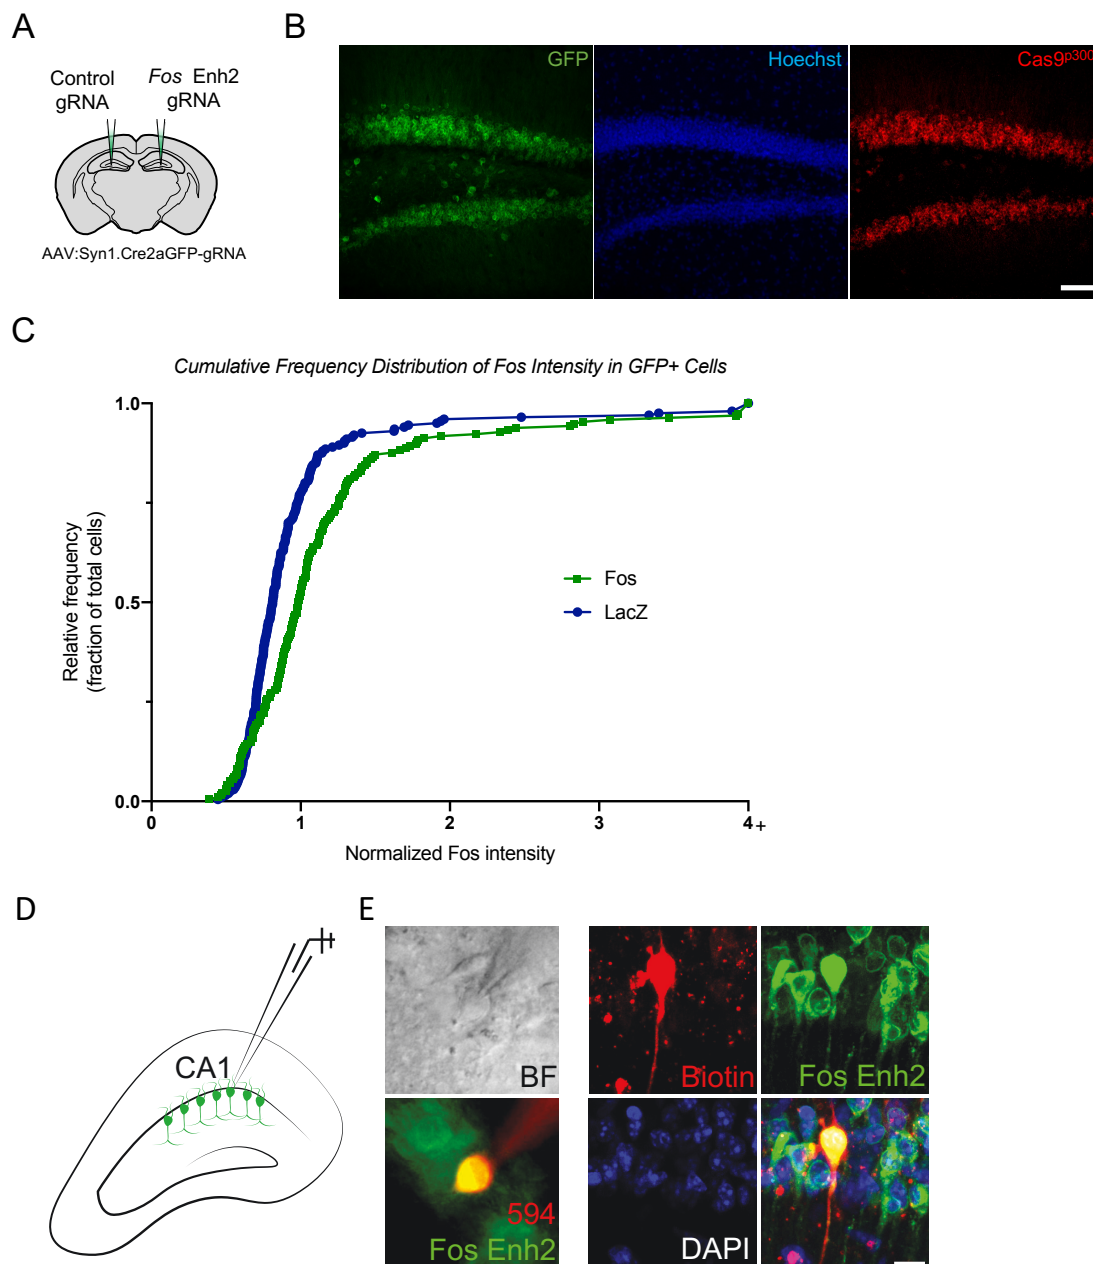

**Supplemental Figure 8: Validation of *in vivo* stereotaxic viral injection into the brain to activate *dCas9<sup>p300</sup>* expression and neuronal gene regulation.** A) Contralateral injection strategy to compare two treatments in the same animal. B) Representative image showing delivery of the AAV vector encoding Cre and *GFP* under the control of the *Syn1* promoter and a gRNA expression cassette by injection into the hippocampus of *Rosa26:LSL-dCas9<sup>p300</sup>* mice induces *dCas9* expression in most neurons. Scale bar = 50 $\mu$ m. n = 3 C) Cumulative frequency distribution of FOS fluorescence intensity for all GFP+ cells, normalized to the average FOS intensity in the paired control. *LacZ*-gRNA: n = 197 cells, *Fos Enh2*-gRNA: n = 190 cells from 3 animals.  $p < 0.001$  by Kolmogorov-Smirnov test. D) Schematic of current clamp recording of CA1 neurons. E) Representative images confirming that recorded CA1 neurons are positive for both biotin and GFP+, with GFP being an indicator that AAV has transduced the recorded cell and that biotin was introduced through the patch pipette after recording. BF = bright field, scale bar = 10 $\mu$ m, n = 3.

**A**

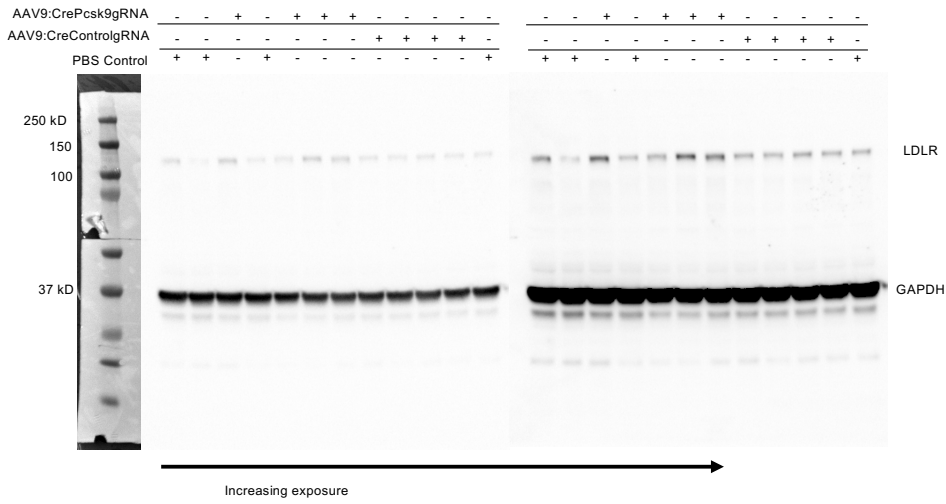

**B**

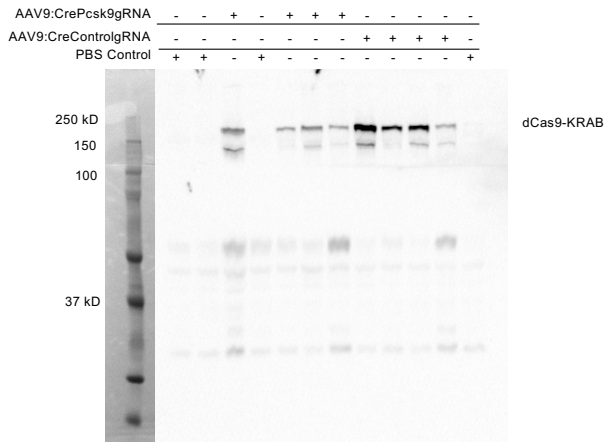

**Supplemental Figure 9: Western blots showing *dCas9<sup>KRAB</sup>* expression and increase in LDLR upon repression of *Pcsk9*. A) Western blots visualized with low (left) and high (right) exposure times showing increased LDLR protein in the 3 samples with *dCas9<sup>KRAB</sup>* targeted to the promoter of *Pcsk9*, but not in control-gRNA or saline treated controls (n = 4 per group). B) Western blots from the same mice showing *dCas9<sup>KRAB</sup>* expression in animals that received AA9:CBh.Cre-gRNA (n = 4 per group).**

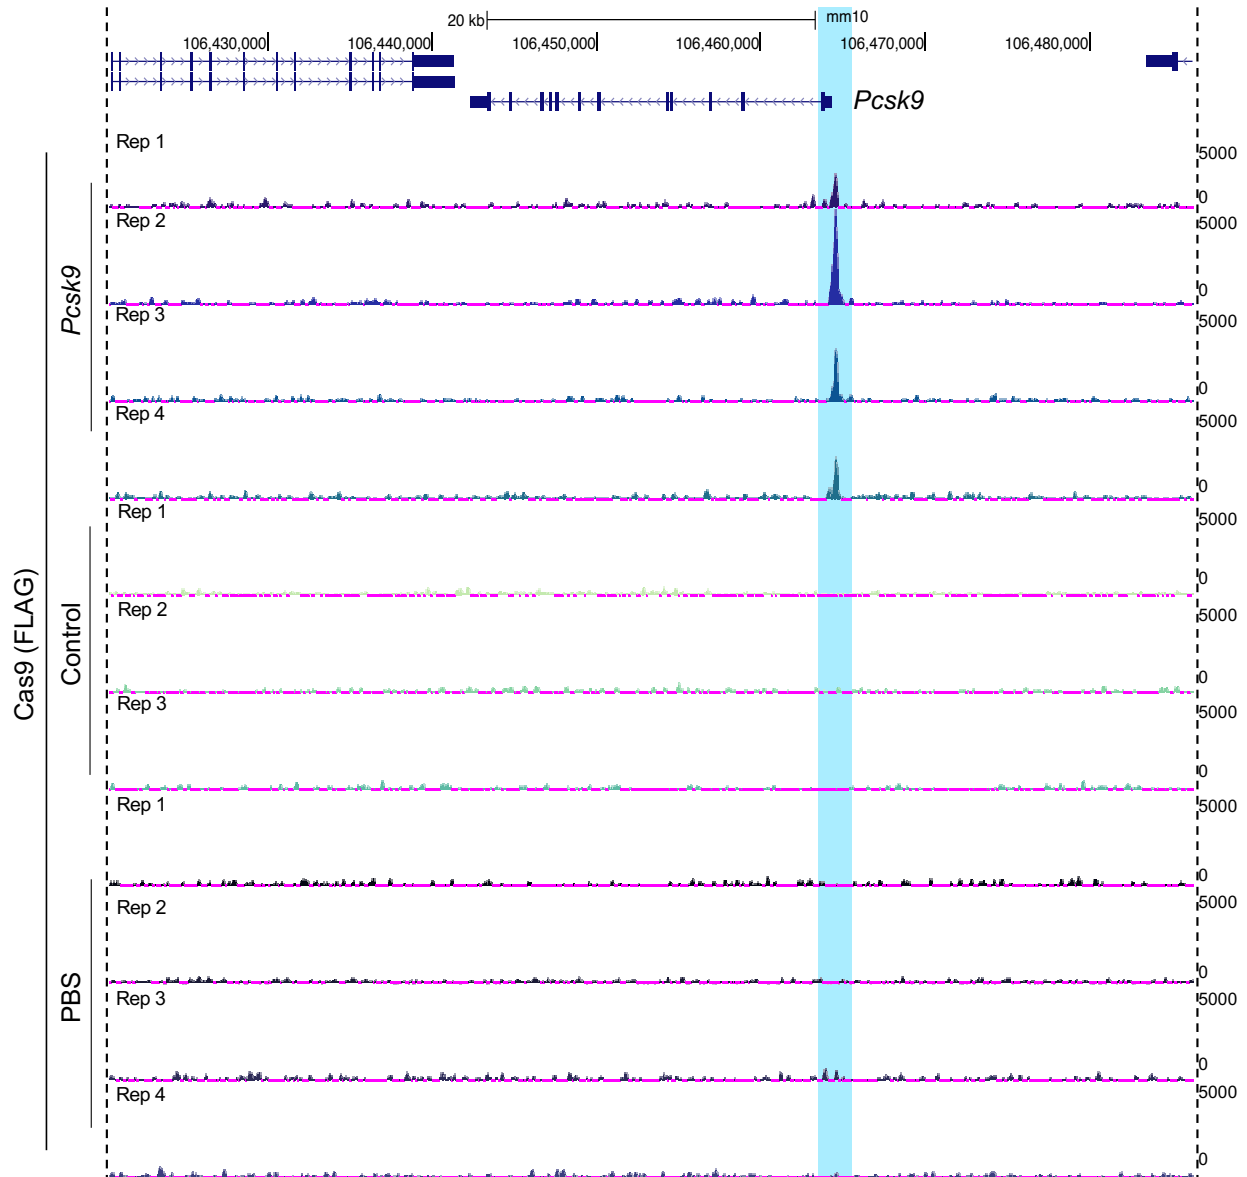

**Supplemental Figure 10: Specificity of *dCas9<sup>KRAB</sup>* binding the *Pcsk9* promoter *in vivo* in the liver of *Rosa26:LSL-dCas9<sup>KRAB</sup>* mice following systemic administration of AAV9 encoding *Cre* and a gRNA.** Genome browser tracks showing FLAG ChIP-seq signal in the liver of *dCas9<sup>KRAB</sup>* mice 14 days post-treatment with AAV9:Cbh.Cre-*Pcsk9*.gRNA, AAV9:Cbh.Cre-control.gRNA, or PBS. Highlighted regions show the area where *dCas9<sup>KRAB</sup>* is targeted to the promoter of *Pcsk9*. Specific signal is found only in the *Pcsk9*-gRNA treated animals.

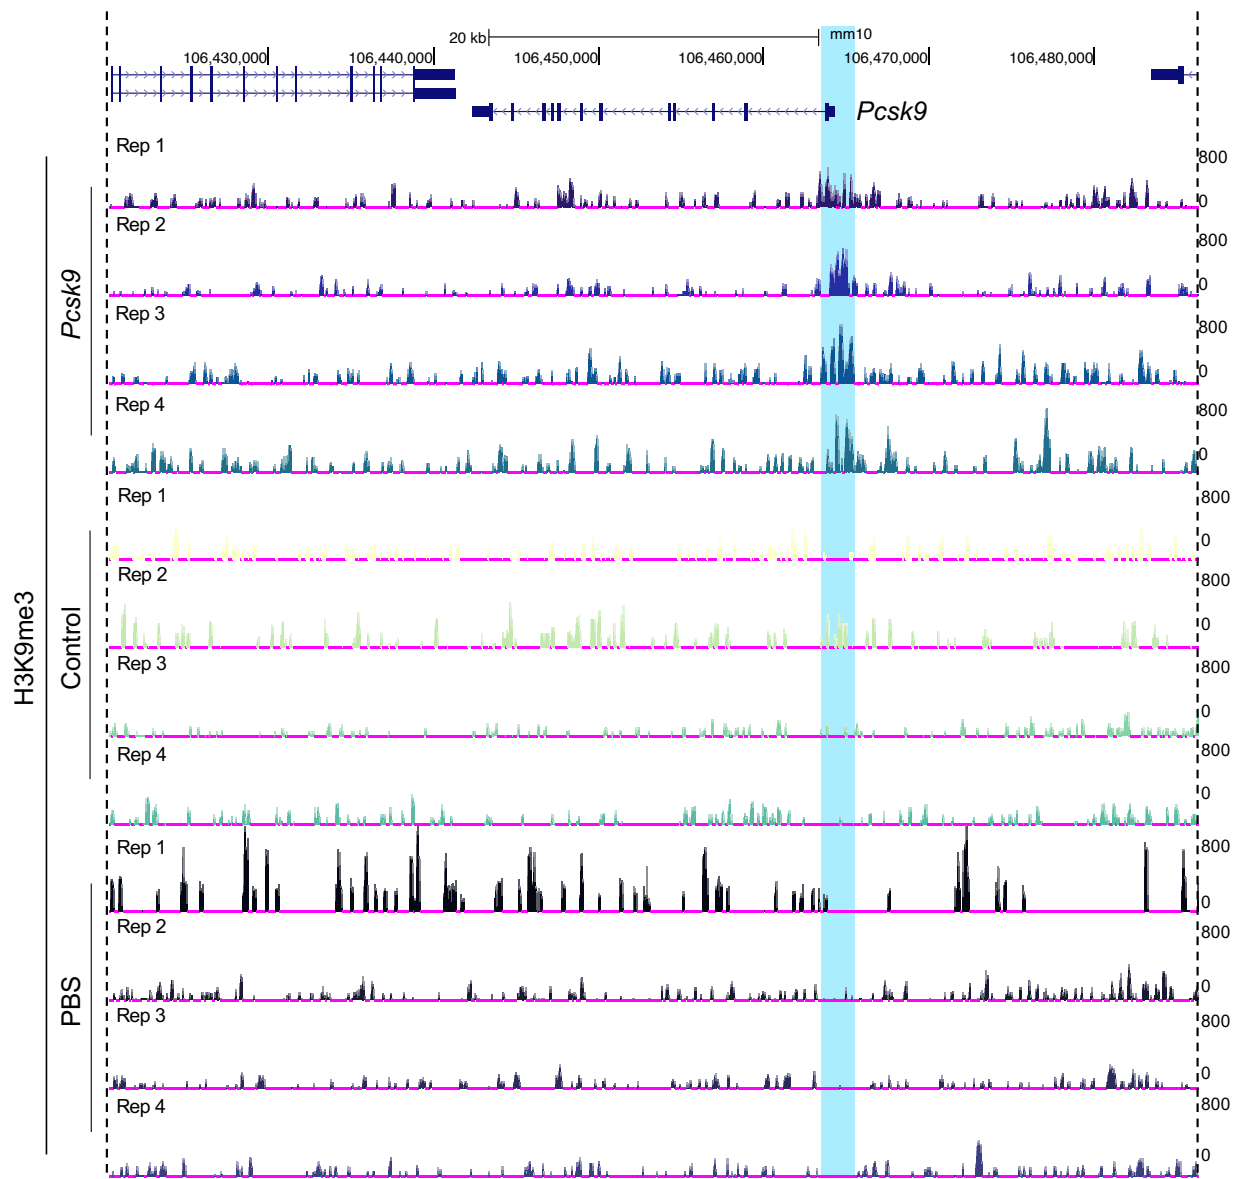

**Supplemental Figure 11: H3K9me3 enrichment at the *Pcsk9* promoter *in vivo* in the liver of Rosa26:LSL-*dCas9<sup>KRAB</sup>* mice following systemic administration of AAV9 encoding *Cre* and a gRNA.** Genome browser tracks showing H3K9me3 ChIP-seq signal for from livers of *dCas9<sup>KRAB</sup>* mice 14 days post-treatment with AAV9:Cbh.Cre-*Pcsk9*.gRNA, AAV9:Cbh.Cre-*control*.gRNA, or PBS. Highlighted regions show the area where *dCas9<sup>KRAB</sup>* is targeted to the promoter of *Pcsk9*. Enrichment of H3K9me3 is noticeable in around the *dCas9<sup>KRAB</sup>* binding site in the *Pcsk9*-gRNA treated animals.

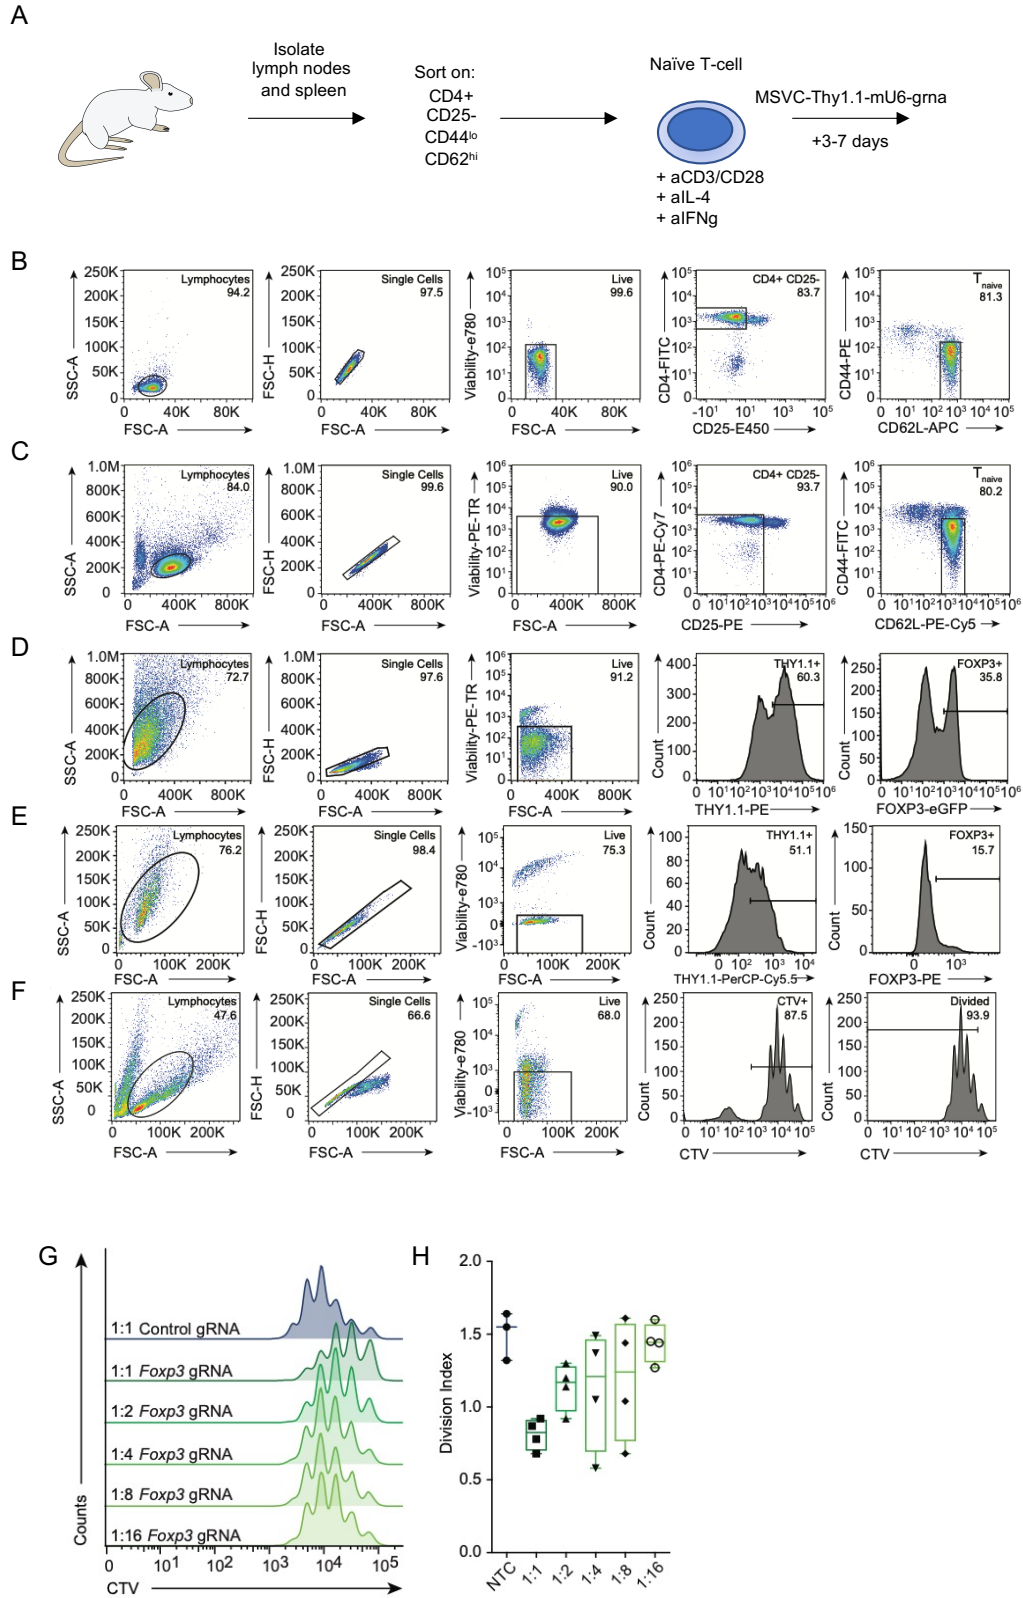

**Supplemental Figure 12: Manipulation of gene expression in T cells from *dCas9<sup>sp300</sup>* and *dCas9<sup>KRAB</sup>* mice. A) Schematic of T cell isolation strategy for the *Rosa26:LSL-dCas9<sup>sp300</sup>* or *dCas9<sup>KRAB</sup>* mice. B)**

Representative sort strategy for the purification of naïve CD4<sup>+</sup> T cells using the Beckman Coulter Astrios or B) SONY SH800S sorter (Lymphocytes / Single Cells / Live cells / CD4<sup>+</sup> / CD25<sup>-</sup> / CD62L<sup>hi</sup> / CD44<sup>lo</sup>). **C)** Representative sort strategy for dCas9<sup>p300</sup>-induced Tregs used in all experiments (Lymphocytes / Single Cells / Live cells / THY1.1<sup>+</sup> / FOXP3-eGFP<sup>+</sup>). **D-E)** Gating strategy used for analyzing all *Foxp3* activation and repression experiments and to interpret the effect of targeting *Foxp3* with D) dCas9<sup>p300</sup> in Th0 cells or E) dCas9<sup>KRAB</sup> in iTreg cells (Lymphocytes / Single Cells / Live cells / THY1.1<sup>+</sup> / FOXP3<sup>+</sup>). **F)** Gating strategy used for analysis of all suppression assays in order to determine the proliferation of Tconv when in co-culture with dCas9<sup>p300</sup>-induced Tregs (Lymphocytes / Single Cells / Live cells / Cell Trace Violet<sup>+</sup> / Divided). **G)** Cell proliferation traces from *in vitro* assays of suppression of T cell proliferation when co-cultured with T cells expressing control non-targeting gRNA (n = 3) or various dilutions of T cells expressing the *Foxp3*-targeting gRNA (n = 4 per dilution). **H)** Quantification of division index from this suppression assay, showing a significant difference between cells treated with the control-targeting gRNA and *Foxp3*-targeting gRNA (p = 0.0346, one-way ANOVA with Dunnett's post-hoc, n = 3 for non-targeting control (NTC) and n = 4 for *Foxp3*-targeting gRNA samples). For the boxplot, box was drawn from the 25<sup>th</sup> to 75<sup>th</sup> percentile with the horizontal bar at the mean and whiskers extend to the data minimum and maximum.

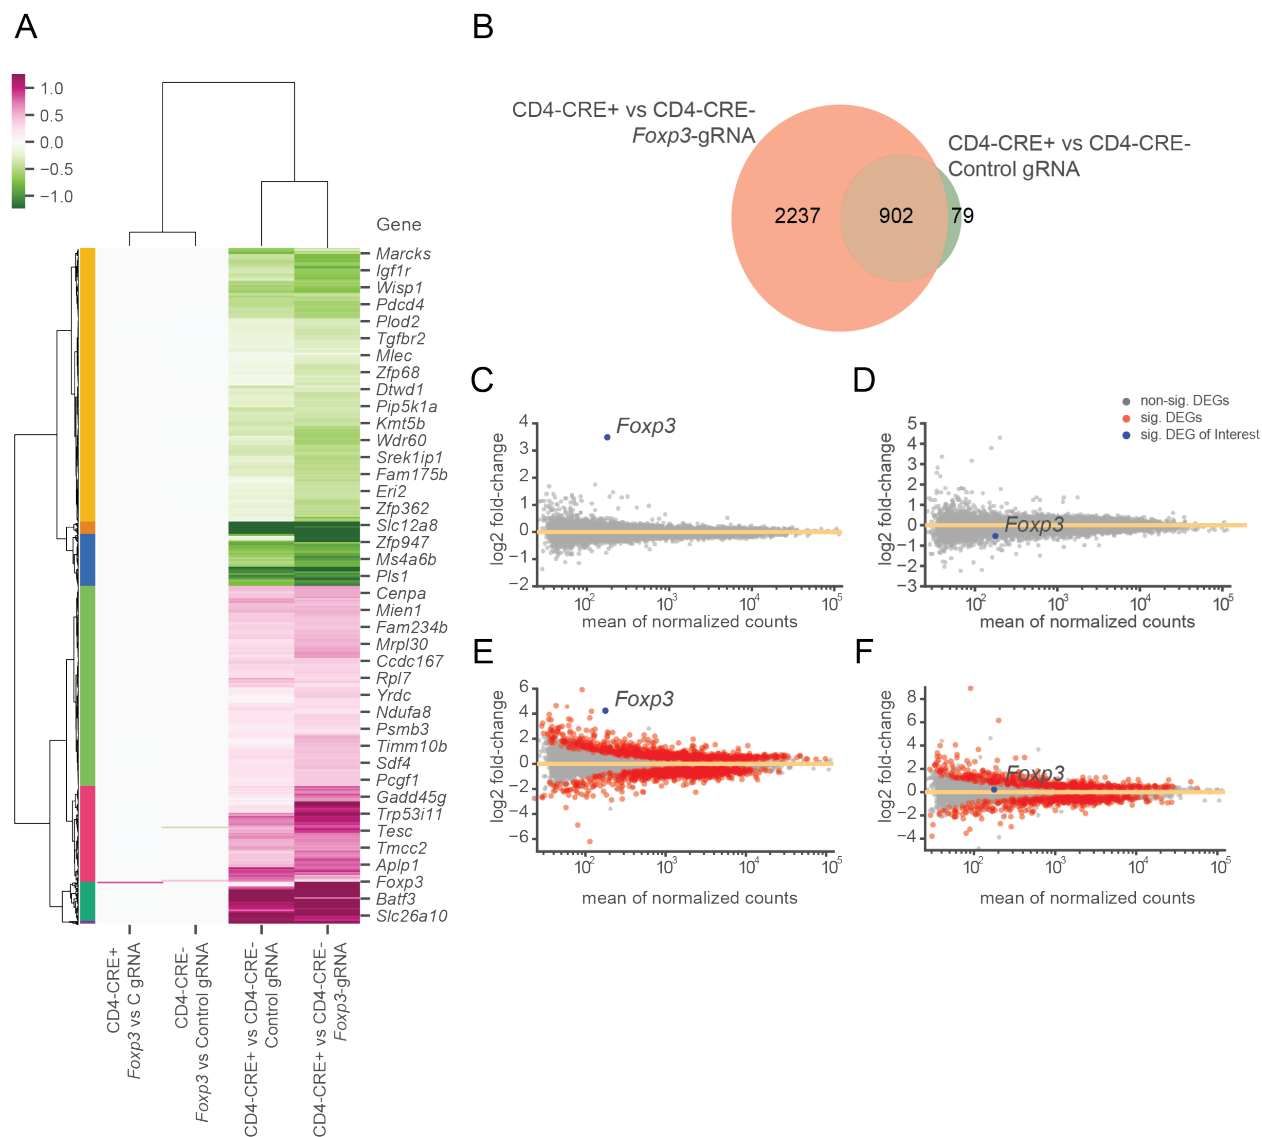

**Supplemental Figure 13: Genome wide-specificity of gene regulation by *dCas9<sup>p300</sup>* determined by RNA-seq in Th0 cells.** A) Heatmap visualization and hierarchical clustering of  $\log_2(\text{fold-change})$  in gene expression comparing Th0 cells from *Rosa26:LSL-dCas9<sup>p300</sup>* mice crossed with or without *Cd4:Cre* and treated with the indicated gRNAs. B) The intersection between genes found to be differentially expressed when comparing Th0 cells with or without *Cd4:Cre* and treated with the *Foxp3*-targeting gRNA or with the control non-targeting gRNA. C-F) MA plots depicting  $\log_2(\text{fold-change})$  gene expression changes for C) *Cd4:Cre*<sup>+</sup> *Foxp3*-gRNA vs *Cd4:Cre*<sup>+</sup> control-gRNA; D) *Cd4:Cre*<sup>-</sup> *Foxp3*-gRNA vs *Cd4:Cre*<sup>-</sup> control-gRNA; E) *Cd4:Cre*<sup>+</sup> *Foxp3*-gRNA vs *Cd4:Cre*<sup>-</sup> *Foxp3*-gRNA; F) *Cd4:Cre*<sup>+</sup> control-gRNA vs *Cd4:Cre*<sup>-</sup> control-gRNA. Significant differentially expressed genes are in red (FDR < 0.01); *Foxp3* target gene is labeled in blue.
