# Supplementary material
Source: PubMed Central journal article supplement (PMC8349887)

|          | Heart |   | Gastroc |   | Spleen |   | Pancreas |   |
|----------|-------|---|---------|---|--------|---|----------|---|
| AAV9:CRE | -     | + | -       | + | -      | + | -        | + |

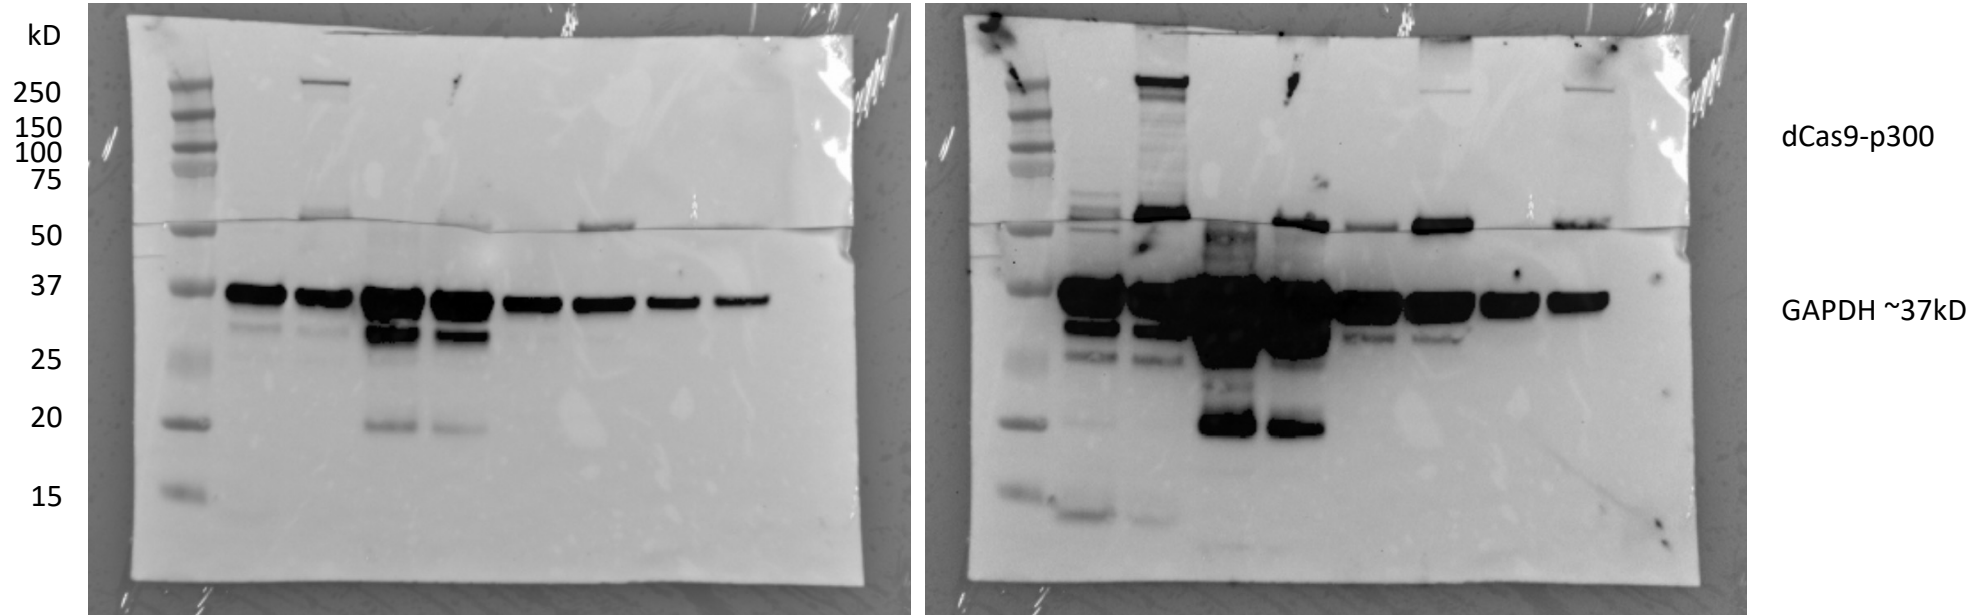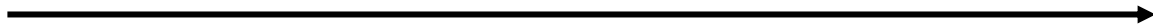

Increasing exposure time

Supplement: NIHMS1713112-supplement-UnmodifiedGels_SupplementaryFigure1A.pdf [file NIHMS1713112-supplement-UnmodifiedGels_SupplementaryFigure1A.pdf]

AAV9:CRE

| Ladder | Spleen |   | Pancreas |   | Heart |   | Gastroc |   |
|--------|--------|---|----------|---|-------|---|---------|---|
|        | -      | + | -        | + | -     | + | -       | + |

kD  
250  
150  
100  
75  
50  
37  
25  
20  
15

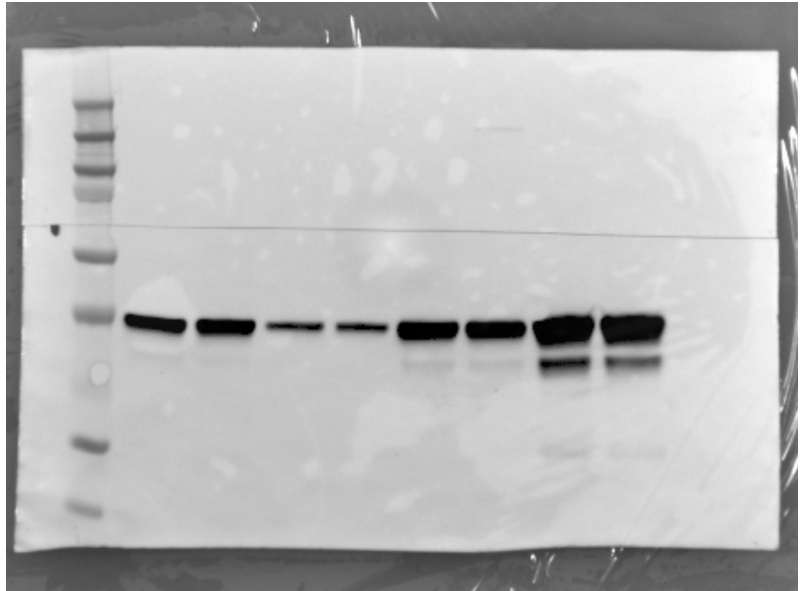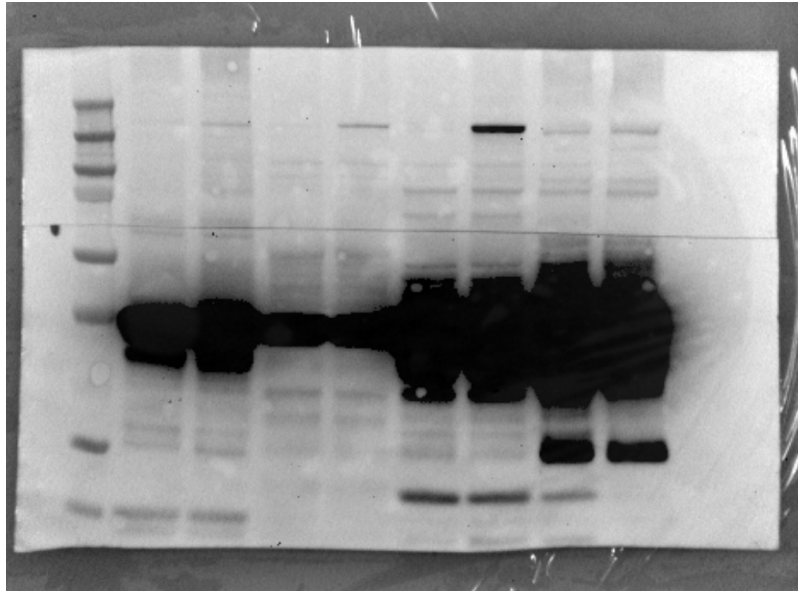

dCas9-KRAB

GAPDH ~37kD

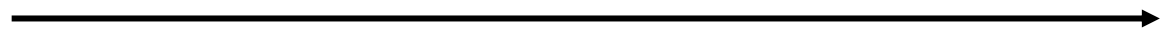

Increasing exposure time

Supplement: NIHMS1713112-supplement-UnmodifiedGels_SupplementaryFigure1B.pdf [file NIHMS1713112-supplement-UnmodifiedGels_SupplementaryFigure1B.pdf]

**A**

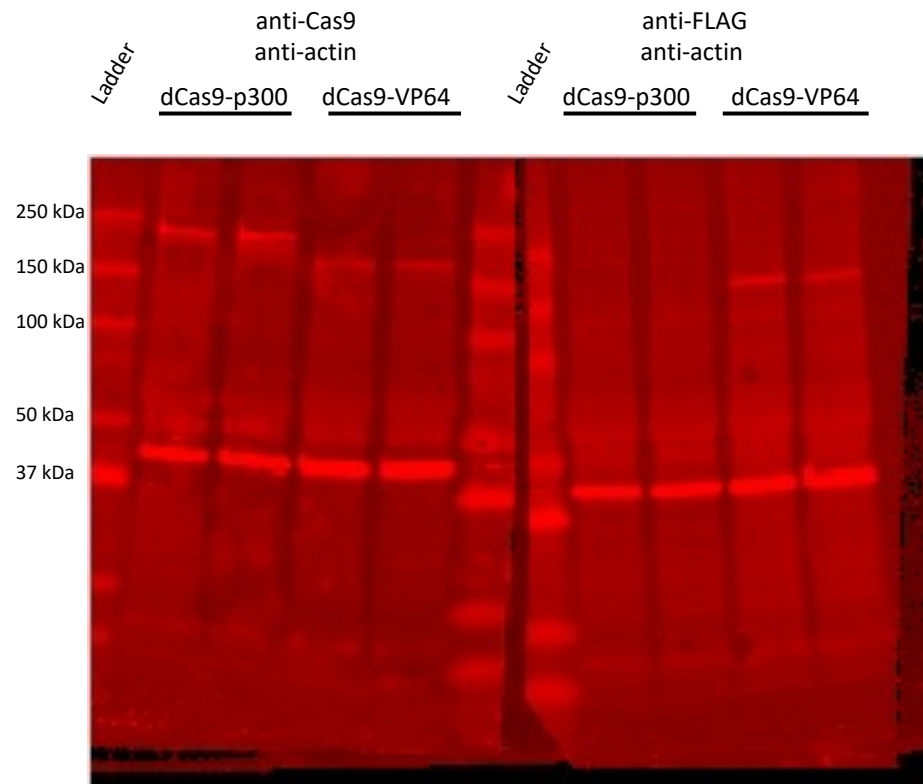

**B**

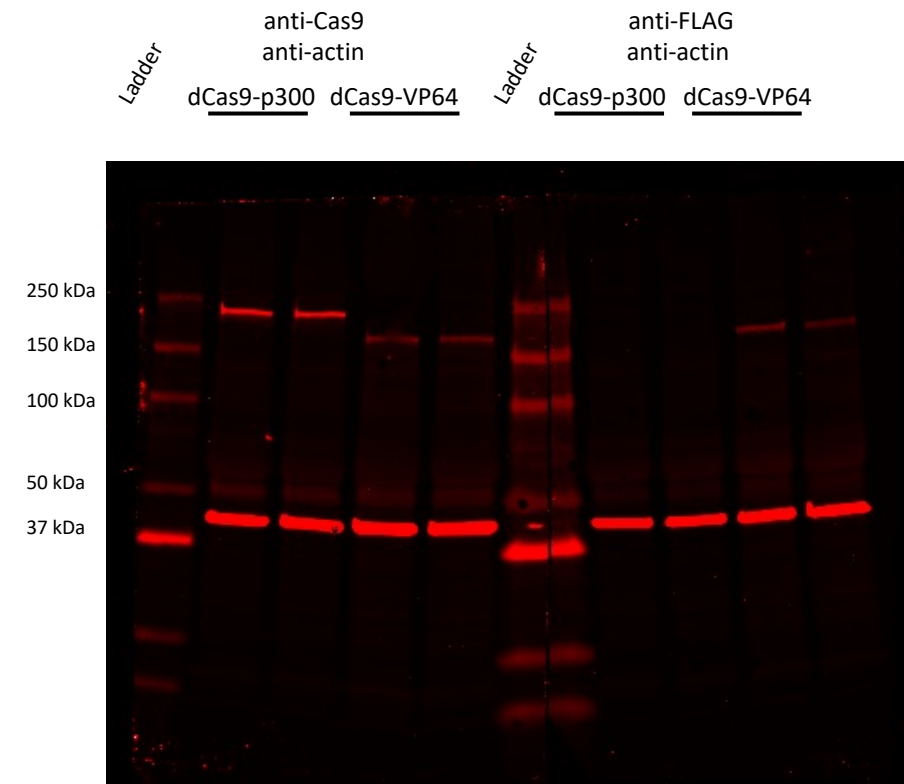

Supplement: NIHMS1713112-supplement-UnmodifiedGels_SupplementaryFigure7D.pdf [file NIHMS1713112-supplement-UnmodifiedGels_SupplementaryFigure7D.pdf]
